# Supplementary material for: Insights into the supramolecular and molecular electrocatalytic properties of 1,2-bis(diphenylphosphine)ethane appended nickel(ii) 1,2-dithiosquarate for oxygen and hydrogen evolution reactions
Source: Royal Society of Chemistry journal article supplement (doi:10.1039/d4nj00247d), 2024-01-01
Supplement: d4nj00247d1.pdf [file d4nj00247d1.pdf]

## **ELECTRONIC SUPPORTING INFORMATION**

### **New 1,2-bis(diphenylphosphine)ethane appended nickel(II) 1,2-dithiosquarate: A potent molecular electrocatalysts for oxygen and hydrogen evolution reactions**

Aparna Kushwaha,<sup>a</sup> Devyani Srivastava,<sup>a</sup> Gabriele Kociok-Köhn<sup>b</sup>, Yogita Padwal,<sup>c</sup> Ratna  
Chauhan,<sup>d</sup> Mohd. Muddassir<sup>e</sup> and Abhinav Kumar<sup>a\*</sup>

<sup>a</sup>Department of Chemistry, Faculty of Science, University of Lucknow, Lucknow 226007, India. Email:  
[abhinavmarshal@gmail.com](mailto:abhinavmarshal@gmail.com)

<sup>b</sup>Materials and Chemical Characterisation Facility (MC<sup>2</sup>), University of Bath, Claverton Down, Bath, BA2  
7AY, UK

<sup>c</sup>Department of Physics, Savitribai Phule Pune University, Pune-411007, India.

<sup>d</sup>Department of Environmental Science, Savitribai Phule Pune University, Pune-411007, India.

<sup>e</sup>Department of Chemistry, College of Sciences, King Saud University, Riyadh 11451, Saudi Arabia

## ELECTRONIC SUPPORTING INFORMATION

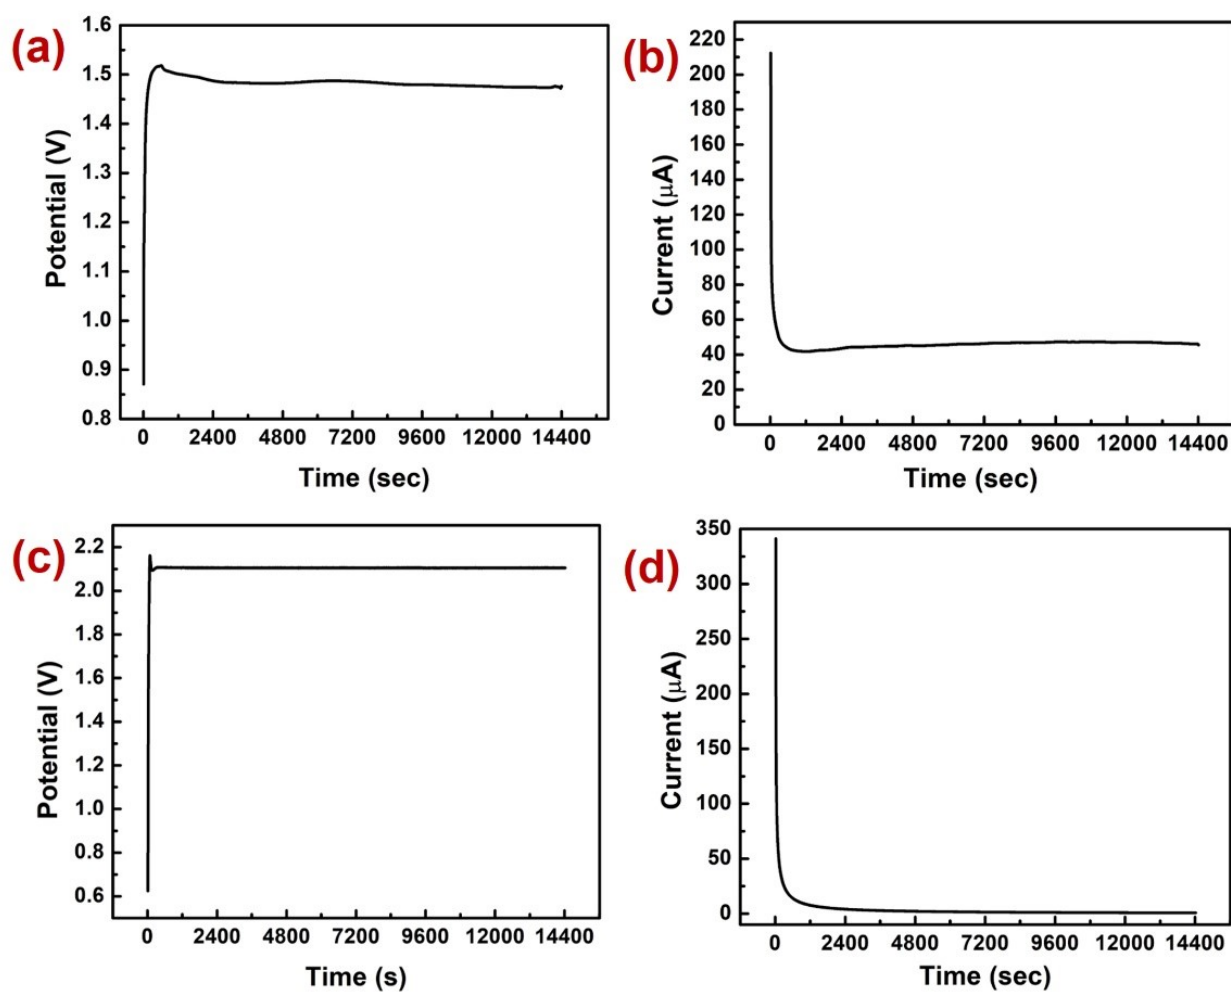

Fig. S1 (a) Chronopotentiometric (performed at  $7 \times 10^{-3}$  A) and (b) Chronoamperometric (performed at 0.9 V) plot in 0.1 M KOH; (c) Chronopotentiometric (performed at  $7 \times 10^{-3}$  A) and (d) Chronoamperometric (performed at 0.5 V) plot in 0.5 M H<sub>2</sub>SO<sub>4</sub>.

## ELECTRONIC SUPPORTING INFORMATION

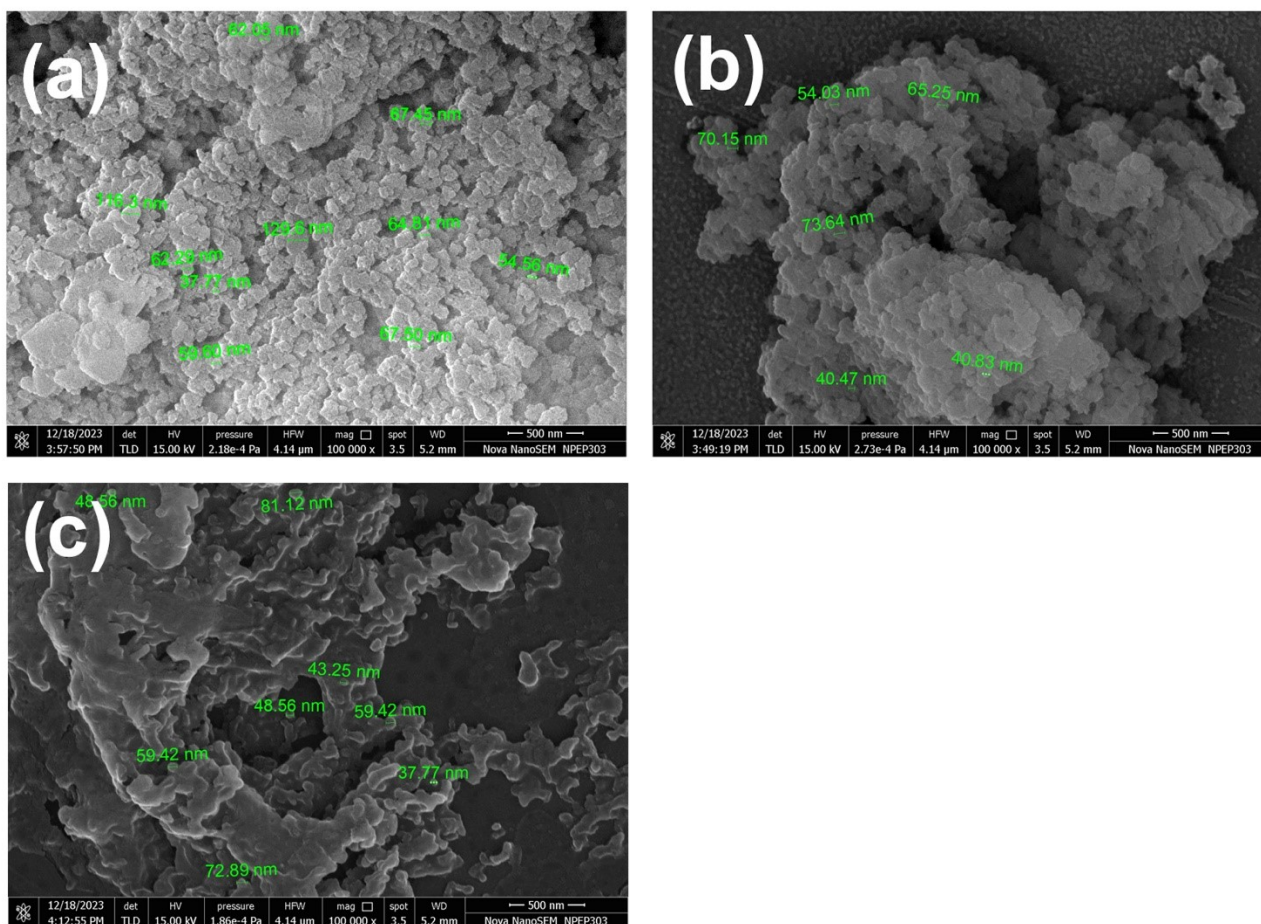

Fig. S2 FESEM images for **Nidtsq** (a) Before OER and HER electrocatalysis; (b) after OER electrocatalysis; (c) after HER electrocatalysis.

# ELECTRONIC SUPPORTING INFORMATION

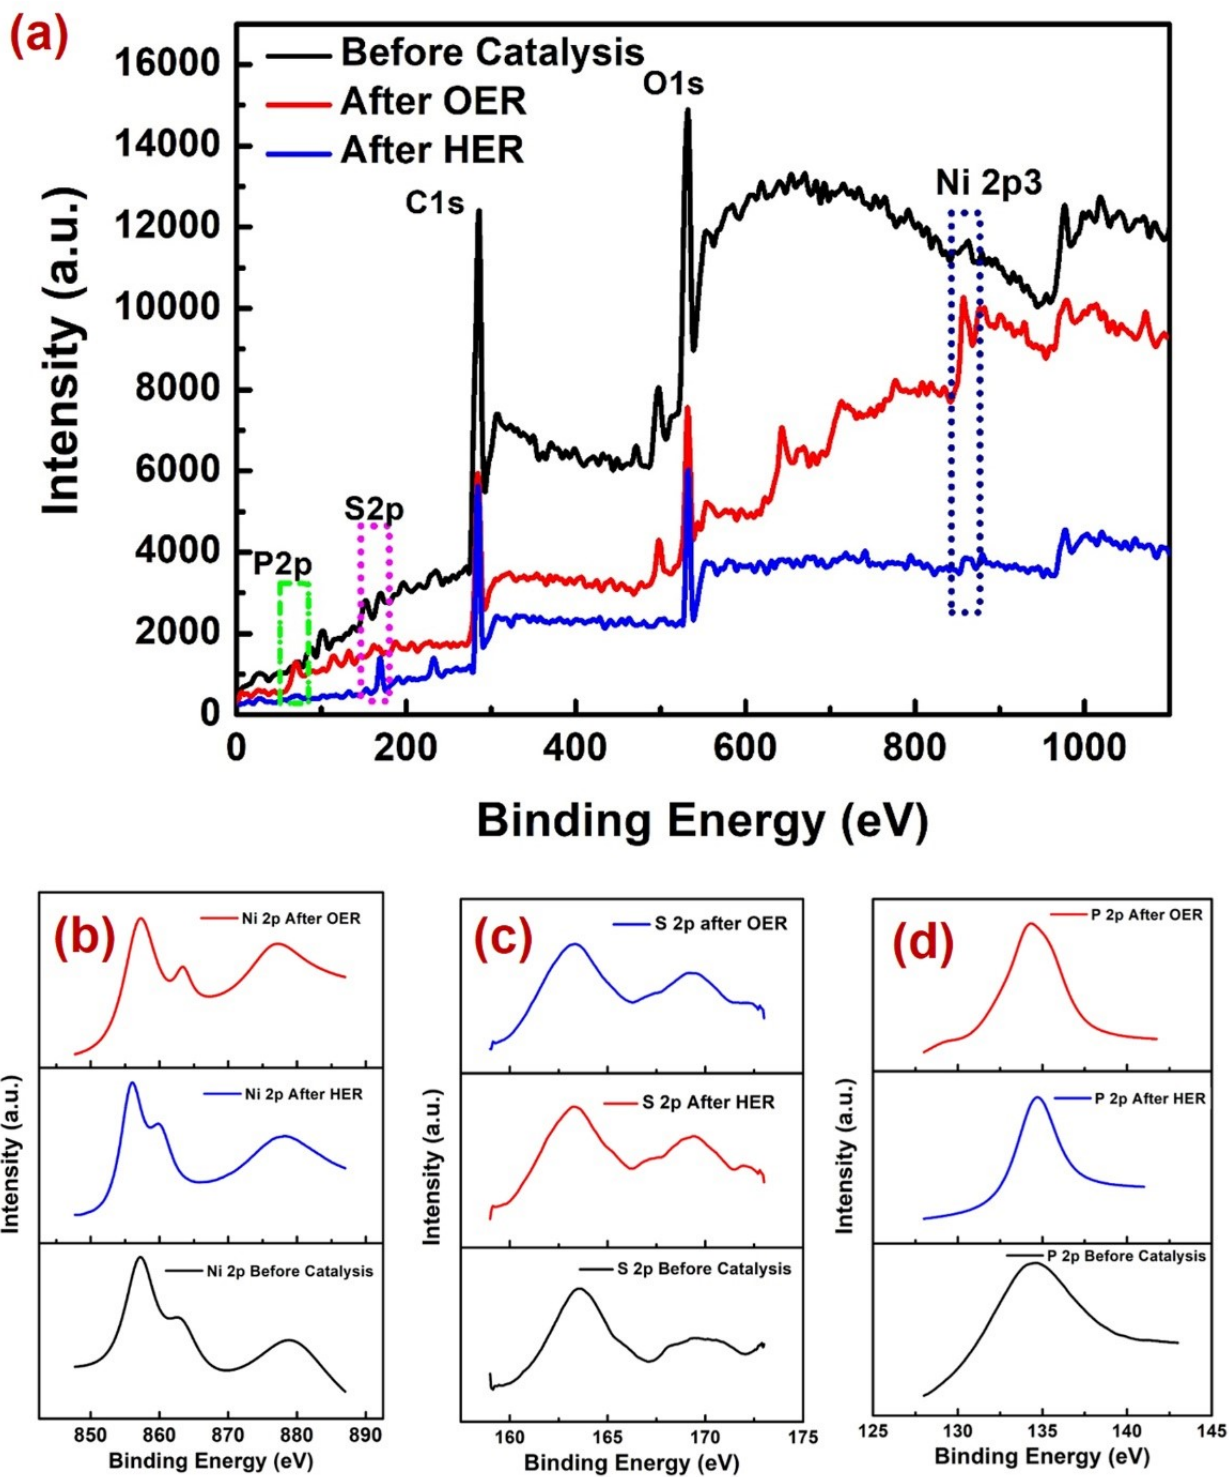

Fig. S3 (a) The full XPS survey spectra for **Nidtsq** before and after OER and HER electrocatalysis; the deconvoluted (b) Ni 2p; (c) S 2p and (d) P 2p XPS spectra for **Nidtsq** recorded before catalysis as well as after OER and HER.
